# Supplementary material for: The m6A reader PRRC2A is essential for meiosis I completion during spermatogenesis
Source: Springer Nature journal article supplement (doi:10.1038/s41467-023-37252-y), 2023-03-24
Supplement: MOESM1 [file 41467_2023_37252_MOESM1_ESM.pdf]

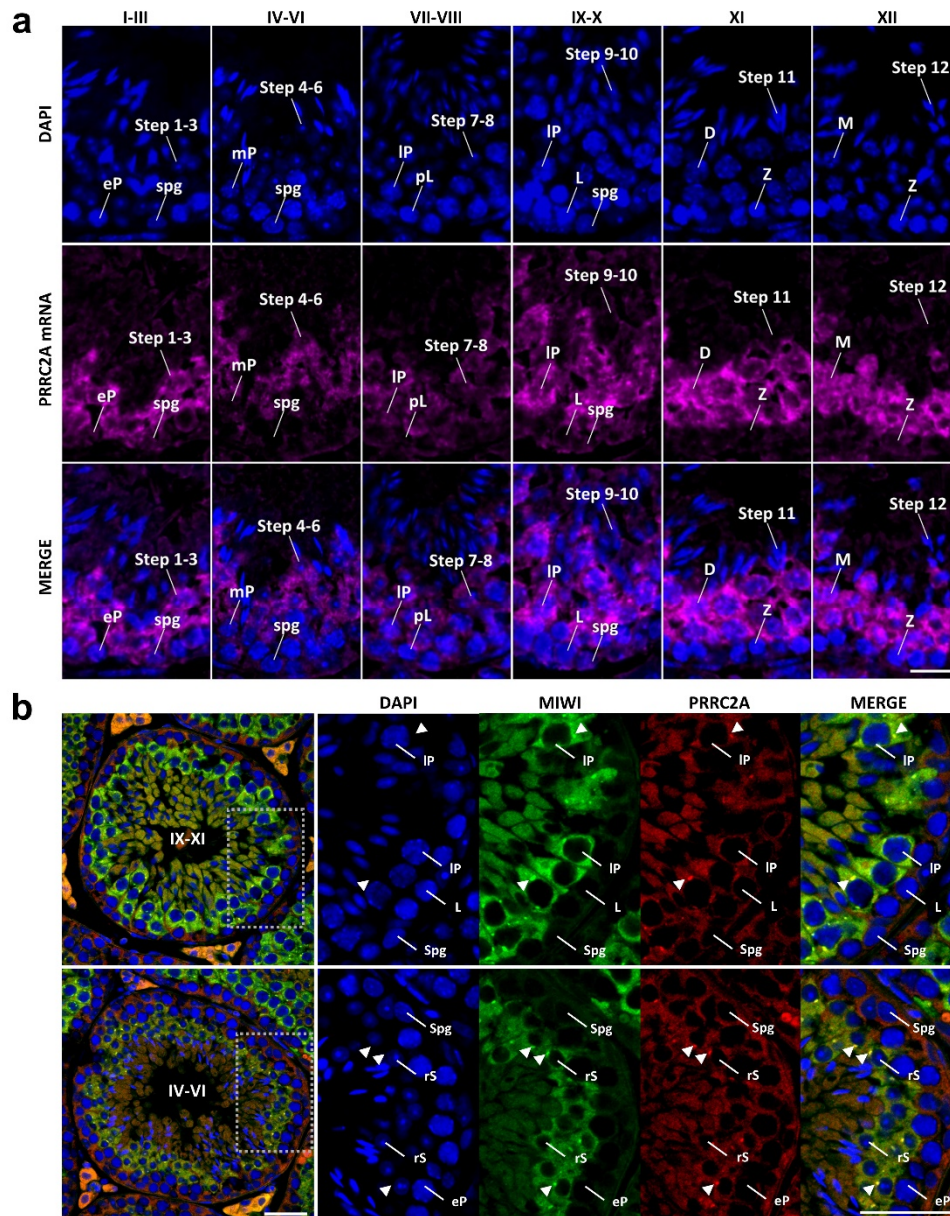

**Supplementary Figure 1. Expression pattern of PRRC2A and generation of transgenic mice** (a) In situ hybridization of PRRC2A mRNA in P60 wild-type testis sections. Scale bar, 20  $\mu$ m. (b) Immunostaining of PRRC2A and MIWI in P60 wild-type testis sections. The right panels show enlarged images of indicated areas. Arrowheads indicate chromatoid bodies within indicated cell types. Spg, spermatogonia; pL, preleptotene spermatocyte; L, leptotene spermatocyte; Z, zygotene spermatocyte; eP, early-pachytene spermatocyte; mp, mid-pachytene spermatocyte; IP,

late-pachytene spermatocyte; D, diplotene spermatocytes; rS, round spermatid; Step 1-3, 4-6, 7-8, 8-9, 11, 12 indicate spermatid at different steps. Scale bar, 20  $\mu\text{m}$ .

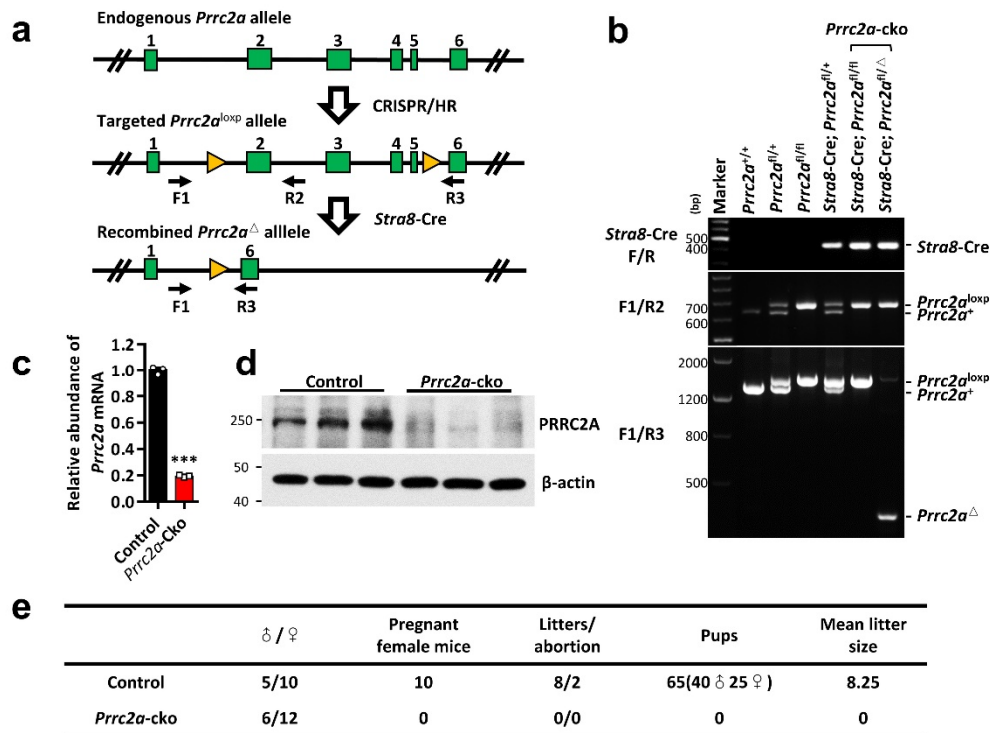

**Supplementary Figure 2. Generation of transgenic mice and infertility of *Prrc2a*-cko mice** (a) Targeting strategy of *Prrc2a*-cko mice. F1, R2, and R3 indicate primers for genotyping (Supplement file 1). (b) Genotyping of *Prrc2a*-cko mice by primers for Stra8-Cre and indicated primers in Figure S2B. (c) qPCR analysis of *Prrc2a* mRNA level in P60 control and *Prrc2a*-cko testes (n = 3). Two-sided student's *t*-test. Error bars, mean ± SEM. \*\*\*p < 0.0001. (d) WB analysis of PRRC2A protein level in P60 control and *Prrc2a*-cko testes. (e) Mating and fertility status of control and *Prrc2a*-cko mice.



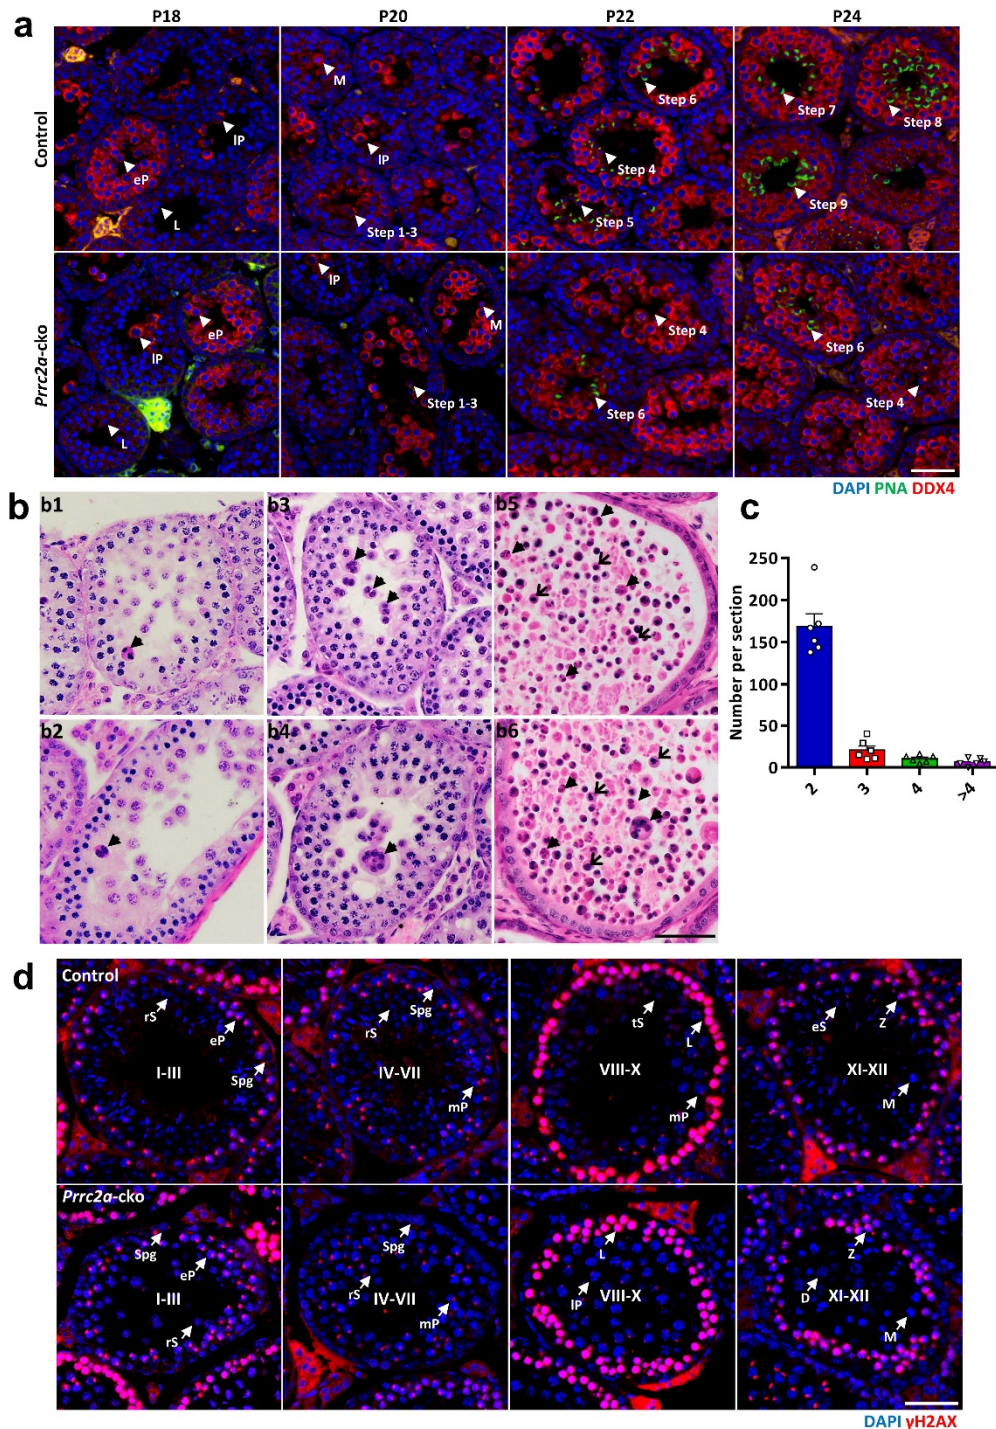

**Supplementary Figure 3. PRRC2A deficiency results in developmental arrest and the production of multinucleated cells.** (a) Co-staining of DDX4 and PNA in control and *Prirc2a-cko* testis sections of indicated ages. Arrowheads indicate the most advanced type of germ cells in corresponding seminiferous tubules. Scale bar, 50  $\mu$ m. (b) H&E staining in testes (b1-b4) and epididymis (b5-b6) sections of P60 control and

*Prrc2a*-cko mice. Arrowheads indicate multinucleated cells. Arrows indicate round spermatids with abnormal nuclear morphology. Scale bar, 50  $\mu$ m. (c) Numbers of 2-nuclei, 3-nuclei, 4-nuclei and 4-plus-nuclei cells per testis section (n = 6 testes) from P60 *Prrc2a*-cko mice. Error bars, mean  $\pm$  SEM. (d) Staining of  $\gamma$ H2AX in adult control and *Prrc2a*-cko testis sections. Seminiferous tubule stages are indicated. Scale bar, 50  $\mu$ m. Spg, spermatogonia; L, leptotene spermatocyte; Z, zygotene spermatocyte; eP, early-pachytene spermatocyte; mP, mid-pachytene spermatocyte; lP, late-pachytene spermatocyte; D, diplotene spermatocyte; M, metaphase spermatocyte; rS, round spermatid; tS, transformed spermatid; eS, elongated spermatid; Step 1-3, 4, 5, 6, 7, 8, 9 indicate spermatid at different steps.

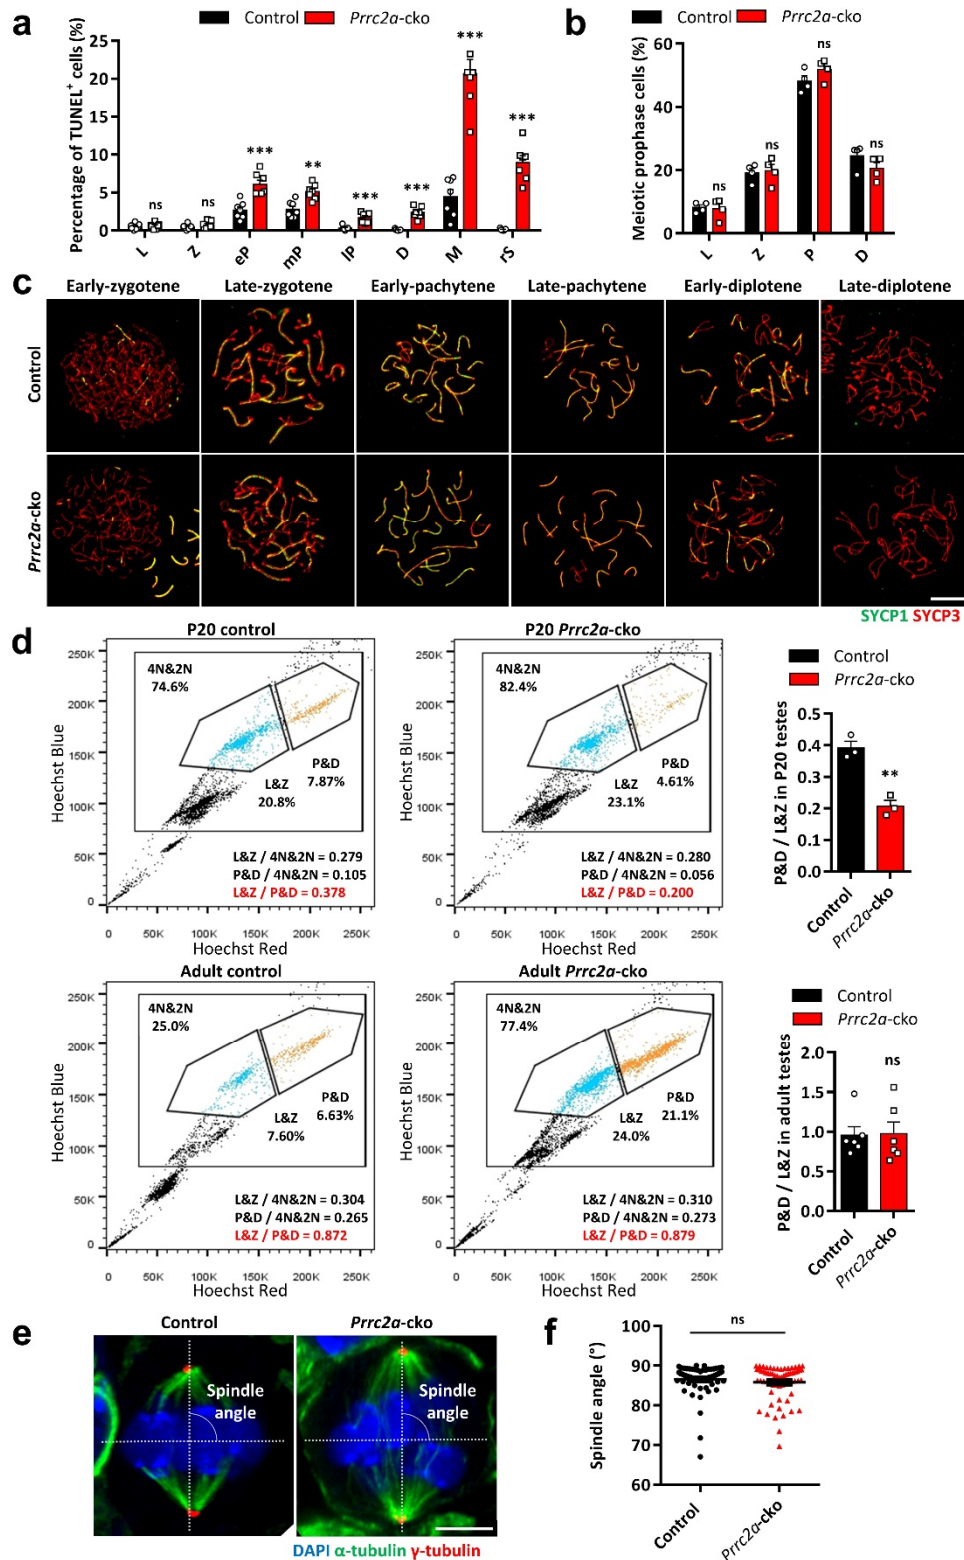

**Supplementary Figure 4. Characterization of PRRC2A-null spermatocytes. (a)**

Percentage of TUNEL<sup>+</sup> spermatocytes at indicated stages from control and *Prrc2a*-cko

mice (n = 7 biologically independent samples). L, leptotene; Z, zygotene; eP, early-

pachytene; mp, mid-pachytene; IP, late-pachytene; D, diplotene; M, metaphase; rS, round spermatid. Two-sided student's *t*-test. Error bars, mean  $\pm$  SEM.  $p = 0.6462$  (for L),  $0.2396$  (for Z),  $0.0004$  (for eP),  $0.0012$  (for mP),  $0.0003$  (for IP),  $< 0.0001$  (for D, M, rS). (b) Proportion of leptotene, zygotene, pachytene, and diplotene spermatocytes in P60 control and *Prrc2a*-cko testes. More than 1000 chromosome spreads of spermatocytes from 4 mice were counted in each group of control and *Prrc2a*-cko. Two-sided student's *t*-test. Error bars, mean  $\pm$  SEM.  $p = 0.8316$  (for L),  $0.8187$  (for Z),  $0.1736$  (for P),  $0.1950$  (for D). (c) Immunostaining of SYCP1 and SYCP3 on chromosome spreads of control and PRRC2A-null spermatocytes. Scale bar, 10  $\mu\text{m}$ . (d) FACS analysis of testicular cells stained with Hoechst 33,342 and PI from P20 and adult control and *Prrc2a*-cko testes. Squares indicate tetraploid and diploid cells (4N&2N), polygons indicate leptotene & zygotene spermatocytes (L&Z) and pachytene & diplotene spermatocytes (P&D). The percentage of the indicated group in total cells and the ratio between indicated groups are shown. Bar charts show the ratio between L&Z and P&D groups ( $n = 3$  mice for P20,  $n = 6$  for adult). Two-sided student's *t*-test. Error bars, mean  $\pm$  SEM. ns  $p = 0.9011$ , \*\* $p = 0.0004$ . (e, f) Measurement of the average intersection angle between the spindle polarity axis and equatorial plate in control and *Prrc2a*-cko metaphase I spermatocytes (Control,  $n = 61$ ; *Prrc2a*-cko,  $n = 64$ ) immunostained with  $\alpha$ -tubulin and  $\gamma$ -tubulin. Two-sided student's *t*-test. Error bars, mean  $\pm$  SEM. ns  $p = 0.3253$ . Scale bar, 5  $\mu\text{m}$ .



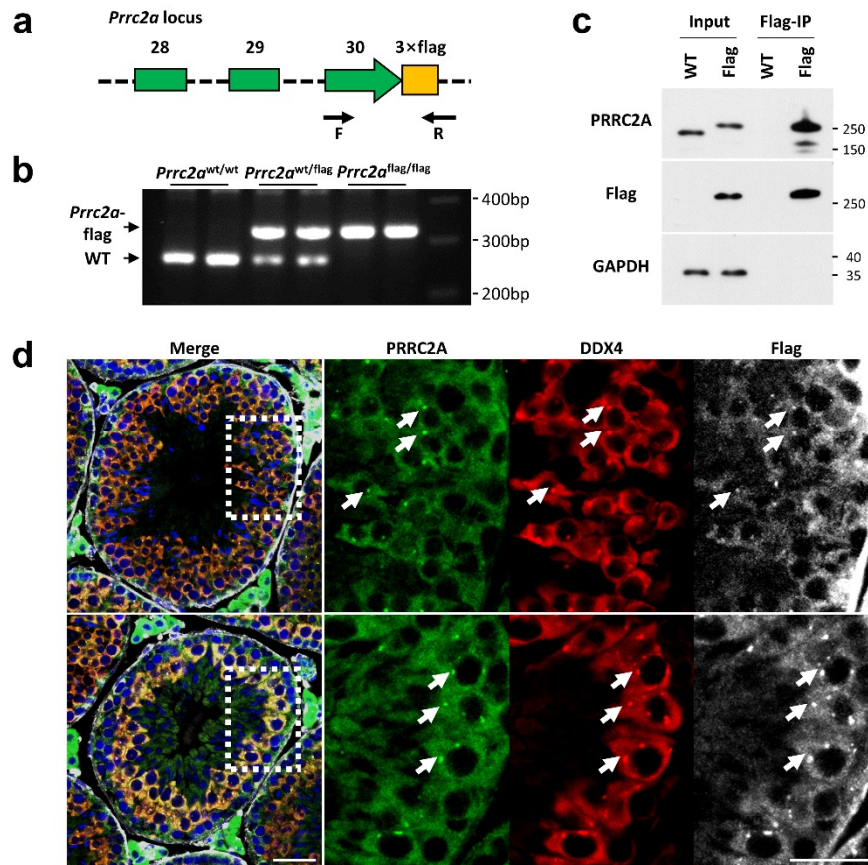

**Supplementary Figure 5. Generation of *Prrc2a*-flag transgenic mice and characterizing the expression of PRRC2A-Flag** (a) Gene locus of *Prrc2a*-flag mice, 3×flag tag was inserted in the downstream of the last coding exon (exon30). F, R indicate primers for genotyping (Supplementary file 1). (b) Genotyping of *Prrc2a*-flag mice by indicated primers in Figure S5A. (c) IP was performed with testes lysate of adult wild-type (WT) and *Prrc2a*-flag (Flag) mice by anti-Flag antibody, followed by WB detection of indicated proteins. (d) Immunostaining of PRRC2A, DDX4, and Flag in testis sections of P60 *Prrc2a*-flag mice. The right panels show enlarged images of indicated areas. Arrows indicate chromatoid bodies. Scale bar, 20 μm.



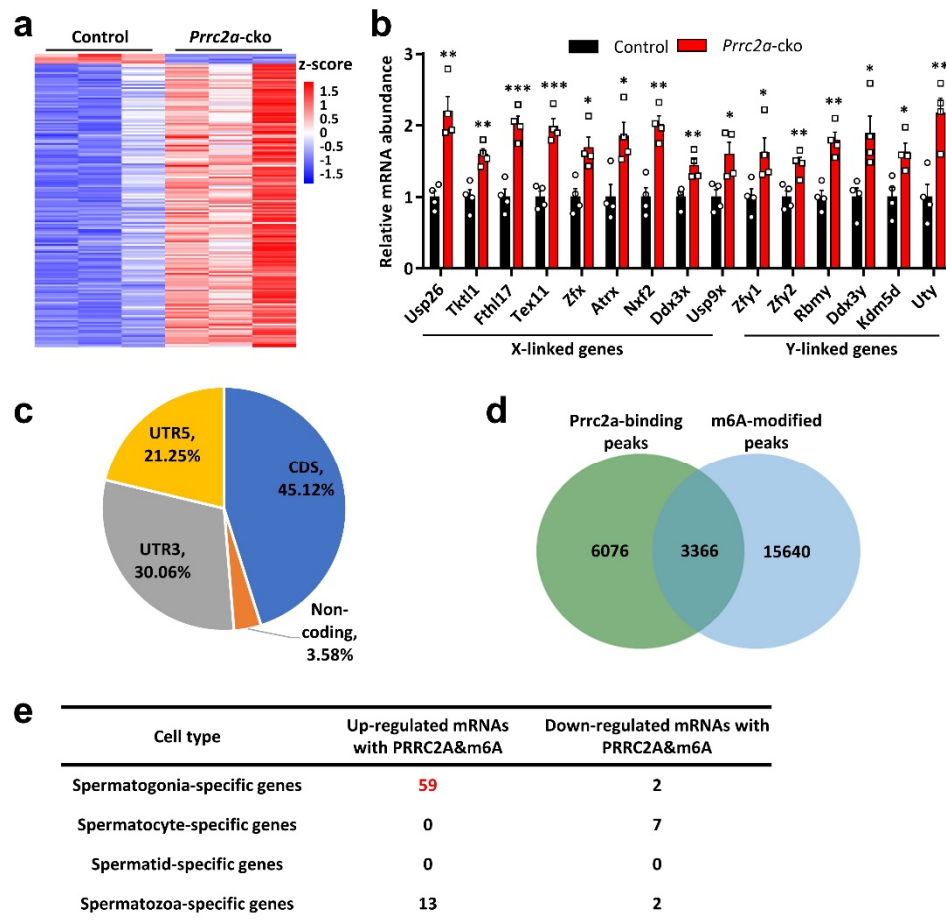

**Supplementary Figure 6. PRRC2A regulates XY-linked genes and spermatogenic genes** (a) Heatmap showing the X (left) and Y (right) -linked genes differentially expressed in PRRC2A-null and control spermatocytes. (b) Representative XY-linked genes are detected by qPCR in PRRC2A-null and control spermatocytes. Two-sided student's *t*-test. Error bars,  $n = 4$  biological repeats, mean  $\pm$  SEM.  $p = 0.0004, 0.0122, 0.0171, 0.0012, 0.0088, 0.0219, 0.0412, 0.0085, 0.0016, 0.0187, 0.0150, 0.0052$  from left to right. (c) The pie chart shows the distribution region of PRRC2A-binding peaks on transcripts in repeat 2. (d) Overlap of PRRC2A-binding peaks and m6A-modified peaks (refer to Ramesh S. Pillai's paper<sup>11</sup>). (e) Overlap of transcripts with PRRC2A-binding peak containing m6A modification, DTGs in RNA-seq, and cell-type-specific genes.

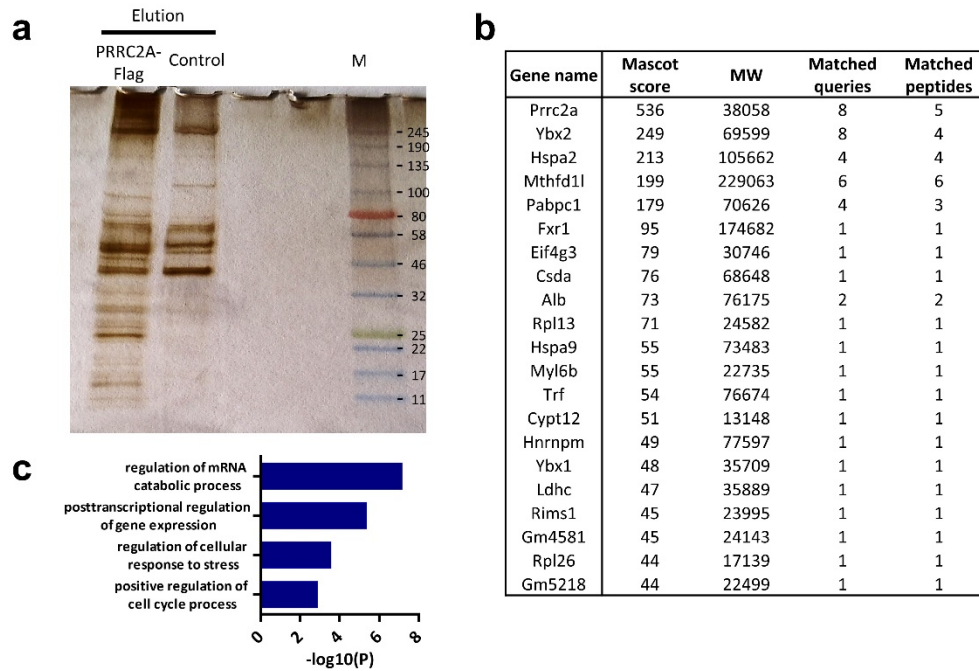

**Supplementary Figure 7. Detection of PRRC2A-binding protein by IP-MS** (a) IP was performed with testes lysate of *Prrc2a*-flag and wild-type mice by anti-Flag antibody and eluted with Flag peptides. The elution samples were detected by silver staining. (b) The elution samples were analyzed by mass spectrometry. (c) GO terms in biological process categories enriched among PRRC2A-binding proteins identified by IP-MS. The list shows Proteins only detected in the *Prrc2a*-flag group.

**Fig.1b**

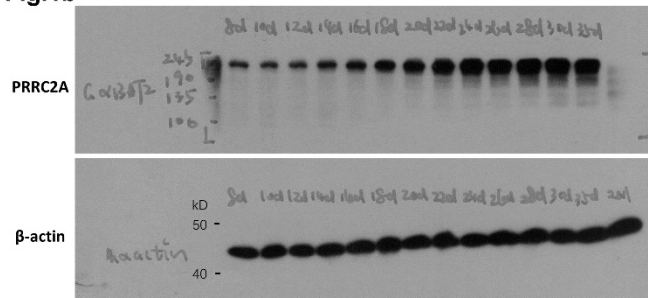

**Fig.4c&7i**

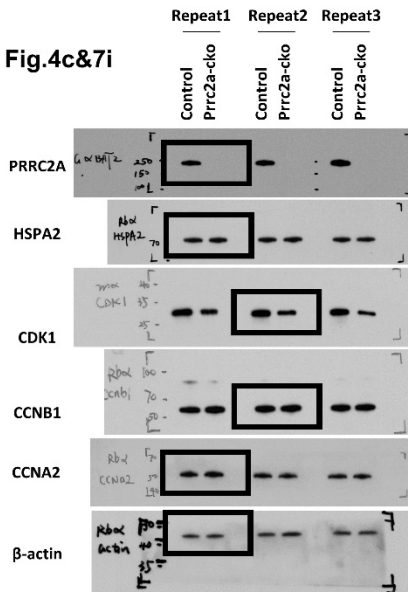

**Fig.7i**

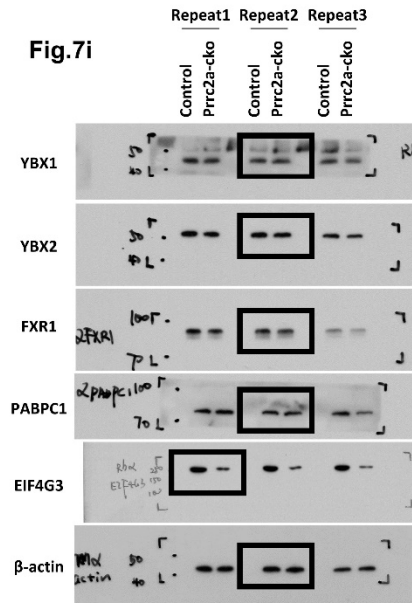

**Fig.7e**

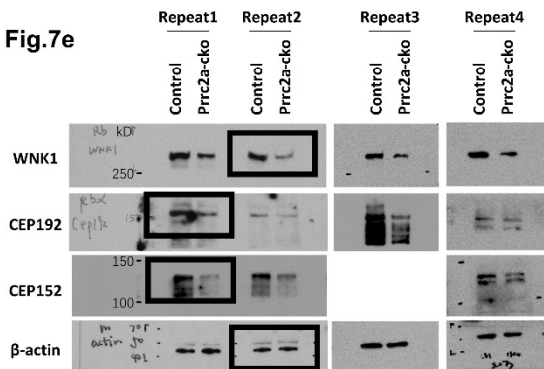

**Fig.7h**

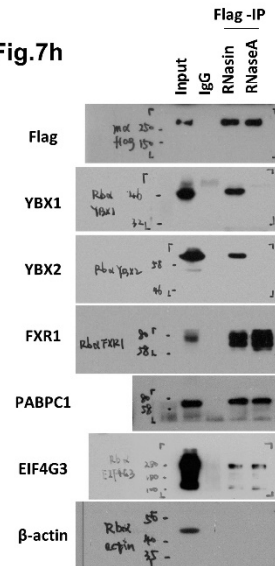

## Supplementary Figure 8. Unprocessed images of immunoblotting

PVDF membranes were cut into several small pieces to incubate with different antibodies for immunoblotting. Black boxes indicate images showed in relevant figures.

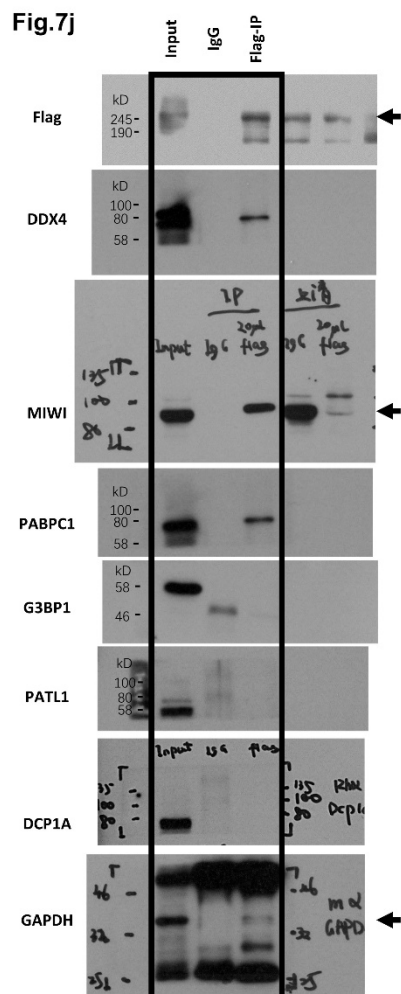

**Supplementary Fig.2d**

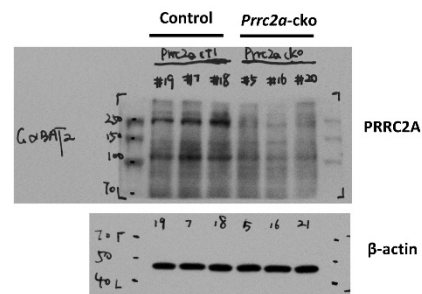

**Supplementary Fig.5c**

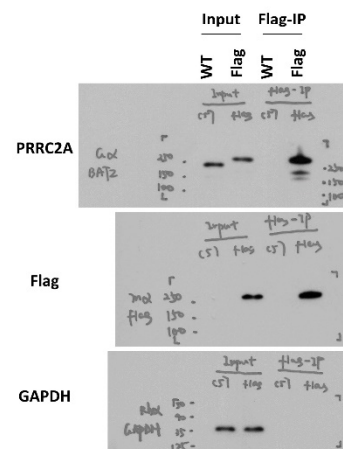

**Supplementary Figure 8. Unprocessed images of immunoblotting**

PVDF membranes were cut into several small pieces to incubate with different antibodies for immunoblotting. Black boxes indicate images showed in relevant figures.



**Supplementary Table 1 List of Primers and gRNAs**

| <b>Primers for genotyping</b> | <b>Sequence</b>            |
|-------------------------------|----------------------------|
| Prrc2a-F1                     | TGGTTACAGGGTGTTGTCGAGGTAGC |
| Prrc2a-R2                     | CCATCCACTTGGCTTCCACAGCCCC  |
| Prrc2a-R3                     | GCGACAGTAGGTTTGATGCC       |
| Stra8-Cre-F                   | ATGTTTTACCAATGTCCACGCTCC   |
| Stra8-Cre-R                   | GGCAGGTTTTGGTGCACAGTCAGC   |
| Prrc2a-flag-F                 | GAAGGATCGCTGACTTACTCTTCC   |
| Prrc2a-flag-R                 | GTGAGACTCCAGACCCACAACC     |
| <b>Primers for qPCR</b>       |                            |
| Prrc2a-F                      | AGGGCAAGTCCTTAGAGATCC      |
| Prrc2a-R                      | TTCAGGCTTGGAAGGTGGC        |
| Usp26-F                       | AATGTAACGAAGGGAGAAGTG      |
| Usp26-R                       | AGGCTTTGCCTTCTTATCGAG      |
| Ube1x-F                       | TGACAGAATCCTACAGCTCTAGC    |
| Ube1x-R                       | CACTGAAGAGTGTGTTCGATGG     |
| Fthl17-F                      | TCTCGAATGCAGCAGAACTATG     |
| Fthl17-R                      | GGTCAAAGTAGACTGCCATCG      |
| Tex11-F                       | GACTGTGGGGTATTGCTTCTG      |
| Tex11-R                       | CAACTGGCTCCTGTTTTCTGT      |
| Zfx-F                         | GCAGTGCATGAACAGCAAGTG      |
| Zfx-R                         | GCCATTCCGGTTTTCAATTCC      |
| Atrx-F                        | GCTTGTGGACAGCAGGTCAAT      |
| Atrx-R                        | GTCACGGCTAATATCGTCACTC     |
| Nxf2-F                        | AAACTGAGGAGGGCGAAACAG      |
| Nxf2-R                        | AGGGATGAAGGGCTCACTACA      |
| Ddx3x-F                       | CAGAGTGGAGGAAGTACAGCA      |
| Ddx3x-R                       | TCACCCCGTGATCCAAAACCTG     |
| Usp9x-F                       | TCCAACAGAATCAGACTTCATCG    |
| Usp9x-R                       | TGGAAATGCAGGTTCCCTCATCT    |
| Zfy1-F                        | CAGATCAGAGCACTAGCATTCG     |
| Zfy1-R                        | CTGGCAGTGACATTCTGGTCT      |
| Zfy2-F                        | ATCCTTTGACAGCCGACATTT      |
| Zfy2-R                        | CCTCACAGTTGATTCTGGCATC     |
| Rbmy-F                        | ACCATCCTTTTCAAGAACCAGA     |
| Rbmy-R                        | TAACTGCAAAGTGTCTCCCAGA     |
| Ddx3y-F                       | GTTCAAGTATTGTAAGTGTCTGGCA  |
| Ddx3y-R                       | TGCTGGCTGATAAACTGAATGT     |
| Kdm5d-F                       | CCAGGATCTGACGACTTTCTACC    |
| Kdm5d-R                       | TTCTCCGCAATGGGTCTGATT      |

|                                                     |                          |
|-----------------------------------------------------|--------------------------|
| Uty-F                                               | ATGCGGATGCTAGCGAAGTT     |
| Uty-R                                               | GAAAGCGGCAGAGGCTATCT     |
| Cep192-F                                            | CCGCATGCTGACATTACTGC     |
| Cep192-R                                            | TCCTTTCCGTCGTAAGTGGC     |
| Wnk1-F                                              | GGTGTAAGGTGAGCACAGTGA    |
| Wnk1-R                                              | CACAGCTCACAACCCTCCTC     |
| Dazl-F                                              | TCCTCCTTATCCAAGTTCACCAG  |
| Dazl-R                                              | ACAGTTGTATAAGCCTGGTAGTTA |
| Gapdh-F                                             | AAGGTCGGTGTGAACGGATTTG   |
| Gapdh-R                                             | TCCTGGAAGATGGTGATGGGCT   |
| RPL6-F                                              | AAGCCCAAGAAGGCGAAGC      |
| RPL6-R                                              | GCAGCCGAGTATTTCTTTTGTA   |
| <b>Primers for PRRC2A RIP-qPCR and MeRIP-qPCR</b>   |                          |
| Cep192-peak-F                                       | CCATCTGGGAATGCCACCTT     |
| Cep192-peak-R                                       | TACAGCCCAGAAGCCACAAG     |
| Wnk1-peak-F                                         | AGGAGGATAGGAGCCAGCAA     |
| Wnk1-peak-R                                         | AAGGAGCCTCTGCCGATTTC     |
| Dazl-F                                              | TCCTCCTTATCCAAGTTCACCAG  |
| Dazl-R                                              | ACAGTTGTATAAGCCTGGTAGTTA |
| Gapdh-F                                             | AAGGTCGGTGTGAACGGATTTG   |
| Gapdh-R                                             | TCCTGGAAGATGGTGATGGGCT   |
| <b>gRNA</b>                                         |                          |
| gRNA for generate <i>Prrc2a</i> <sup>f/f</sup> mice | cagctccctaatacagcccc     |
| gRNA for generate <i>Prrc2a</i> -flag mice          | caaggggaactccctcageg     |

**Supplementary Table 2 List of antibody**

| <b>Antibody for immunohistochemistry</b>           |                           |            |         |
|----------------------------------------------------|---------------------------|------------|---------|
| goat anti-PRRC2A                                   | Santa Cruz                | sc-78859   | 1: 200  |
| rabbit anti-DDX4                                   | Abcam                     | ab13840    | 1: 1000 |
| rabbit anti-MIWI                                   | Cell signaling technology | 2079       | 1: 500  |
| mouse anti-Flag                                    | Sigma                     | F1804      | 1: 1000 |
| rabbit anti-SYCP3                                  | Novus                     | NB300-232  | 1: 500  |
| mouse anti-SYCP3                                   | Santa Cruz                | sc-74569   | 1: 100  |
| goat anti-SYCP3                                    | Santa Cruz                | sc-20845   | 1: 100  |
| mouse anti- $\gamma$ H2AX                          | Millipore                 | 05-636     | 1: 500  |
| rabbit anti- $\gamma$ H2AX                         | Cell signaling technology | 20E3       | 1: 1000 |
| mouse anti-RNA polymerase II                       | Santa Cruz                | sc-47701   | 1: 100  |
| mouse anti-DMC1                                    | Proteintech               | 13714-1-AP | 1: 500  |
| mouse anti-MLH1                                    | BD Pharmingen             | 550838     | 1: 50   |
| rabbit anti-MDC1                                   | Proteintech               | 24721-1-AP | 1: 100  |
| rabbit anti-ATR                                    | Proteintech               | 19787-1-AP | 1: 50   |
| rabbit anti-phospho-Histone H3 (Thr3)(pH3)         | Millipore                 | 07-424     | 1: 1000 |
| mouse anti- $\alpha$ -tubulin                      | Sigma                     | T6199      | 1: 500  |
| rabbit anti- $\gamma$ -tubulin                     | Abcam                     | ab179503   | 1: 500  |
| human anti-CREST                                   | Immunovision              | HCT-0100   | 1: 500  |
| rabbit anti-CEP192                                 | Proteintech               | 18832-1-AP | 1: 40   |
| Alexa Fluor® 488 conjugated donkey anti-mouse IgG  | Invitrogen                | A21202     | 1: 500  |
| Alexa Fluor® 488 conjugated donkey anti-rabbit IgG | Invitrogen                | A21206     | 1: 500  |
| Alexa Fluor® 488 conjugated donkey anti-goat IgG   | Invitrogen                | A11055     | 1: 500  |
| FITC-conjugated affinipure goat anti-human IgG     | Proteintech               | SA00003-12 | 1: 500  |
| Alexa Fluor® 546 conjugated donkey anti-mouse IgG  | Invitrogen                | A10036     | 1: 500  |
| Alexa Fluor® 546 conjugated donkey anti-rabbit IgG | Invitrogen                | A10040     | 1: 500  |
| Alexa Fluor® 594 conjugated goat anti-mouse IgG    | Invitrogen                | A11001     | 1: 500  |
| Alexa Fluor® 594 conjugated goat anti-rabbit IgG   | Invitrogen                | A11012     | 1: 500  |
| Alexa Fluor® 647 conjugated goat anti-mouse IgG    | Invitrogen                | A31571     | 1: 500  |

| <b>Antibody for WB</b>              |                           |            |          |
|-------------------------------------|---------------------------|------------|----------|
| goat anti-PRRC2A                    | Santa Cruz                | sc-78859   | 1: 200   |
| mouse anti-Flag                     | Sigma                     | F1804      | 1: 1000  |
| mouse anti- $\beta$ -actin          | Proteintech               | 60008-1-Ig | 1: 5000  |
| rabbit anti- $\beta$ -actin         | ABclonal                  | AC026      | 1: 50000 |
| mouse anti-GAPDH                    | ABclonal                  | AC033      | 1: 20000 |
| rabbit anti-CEP152                  | Proteintech               | 21815-1-AP | 1: 500   |
| mouse anti-CDK1                     | Abcam                     | ab18       | 1: 200   |
| rabbit anti-CCNB1                   | Cell signaling technology | 4138       | 1: 500   |
| rabbit anti-CCNA2                   | Abcam                     | ab181591   | 1: 2000  |
| rabbit anti-CEP192                  | Proteintech               | 18832-1-AP | 1: 500   |
| rabbit anti-WNK1                    | Proteintech               | 28357-1-AP | 1: 10000 |
| goat anti-DAZL                      | GeneTex                   | GTX89448   | 1: 500   |
| rabbit anti-PABPC1                  | Proteintech               | 10970-1-AP | 1: 1000  |
| rabbit anti-YBX1                    | Abcam                     | ab76149    | 1: 2000  |
| rabbit anti-YBX2                    | Abcam                     | ab154829   | 1: 2000  |
| rabbit anti-FXR1                    | Proteintech               | 13194-1-AP | 1: 5000  |
| rabbit anti-EIF4G3                  | Thermo                    | PA5-31101  | 1: 5000  |
| rabbit anti-HSPA2                   | Abcam                     | ab108416   | 1: 8000  |
| rabbit anti-DCP1A                   | Abcam                     | ab183709   | 1: 1000  |
| rabbit anti-G3BP1                   | Proteintech               | 13057-2-AP | 1: 5000  |
| rabbit anti-PATL1                   | ABclonal                  | A13170     | 1: 1000  |
| rabbit anti-DDX4                    | Abcam                     | ab13840    | 1: 1000  |
| rabbit anti-MIWI                    | Cell signaling technology | 2079       | 1: 1000  |
| HRP-conjugated goat anti-rabbit IgG | Sigma                     | A6154      | 1: 5000  |
| HRP-conjugated goat anti-mouse IgG  | Sigma                     | A4416      | 1: 5000  |
| HRP-conjugated rabbit anti-goat IgG | Sigma                     | A5420      | 1: 5000  |
